# Supplementary material
Source: publisher figshare collection journal article supplement (https://frontiersin.figshare.com/ndownloader/files/34890840)

## Appendix 1

**Table S1.** Search strategy for studies aimed to evaluate the association between dietary acrylamide and site-specific cancer. Details are provided below for PubMed, Web of Science and Scopus databases, though with database-specific adjustments accommodated to the requirements of each database as follows.

| <b>Review questions</b>                                                                                                                                                                        |                                                                                                                                                                                                                                                                                                                   |
|------------------------------------------------------------------------------------------------------------------------------------------------------------------------------------------------|-------------------------------------------------------------------------------------------------------------------------------------------------------------------------------------------------------------------------------------------------------------------------------------------------------------------|
| 1) In the pooled analysis of all available and eligible studies, is dietary acrylamide exposure associated with risk of site-specific cancer?                                                  |                                                                                                                                                                                                                                                                                                                   |
| 2) In the pooled analysis of all available and eligible studies, what is the shape of the dose-response relationship between dietary acrylamide exposure and the risk of site-specific cancer? |                                                                                                                                                                                                                                                                                                                   |
| The search was conducted on March 7, 2022.                                                                                                                                                     |                                                                                                                                                                                                                                                                                                                   |
| No time limit defined.                                                                                                                                                                         |                                                                                                                                                                                                                                                                                                                   |
| Language: English                                                                                                                                                                              |                                                                                                                                                                                                                                                                                                                   |
| Population: Adults or older adults (18 and over)                                                                                                                                               |                                                                                                                                                                                                                                                                                                                   |
| Intervention/Exposure: Higher levels of intake to dietary acrylamide                                                                                                                           |                                                                                                                                                                                                                                                                                                                   |
| Comparator: Lower levels of intake to dietary acrylamide                                                                                                                                       |                                                                                                                                                                                                                                                                                                                   |
| Outcomes: Risk of cancer incidence (RR; HR or OR)                                                                                                                                              |                                                                                                                                                                                                                                                                                                                   |
| Study design: Cohort studies, case-cohort and case-control studies                                                                                                                             |                                                                                                                                                                                                                                                                                                                   |
| Exclusion criteria: breast, endometrial and ovarian carcinoma risk                                                                                                                             |                                                                                                                                                                                                                                                                                                                   |
| <b>Database</b>                                                                                                                                                                                | <b>Searches</b>                                                                                                                                                                                                                                                                                                   |
| PubMed                                                                                                                                                                                         | ((acrylamides[MeSH Terms]) OR (acrylamide*[Title/Abstract])) AND (((((((Neoplasms[MeSH Terms]) OR (Neoplasia*[Title/Abstract])) OR (Neoplasm*[Title/Abstract])) OR (Tumor*[Title/Abstract])) OR (Cancer*[Title/Abstract])) OR (Malignanc*[Title/Abstract])) AND ((Risk[MeSH Terms]) OR (Risk*[Title/Abstract])))) |
| Web of Science                                                                                                                                                                                 | (TS=(Neoplasia*) OR TS=(Neoplasm*) OR TS=(Tumor*) OR TS=(Cancer*) OR TS=(Malignanc*)) AND TS=(risk*) AND TS=(acrylamide*)                                                                                                                                                                                         |
| Scopus                                                                                                                                                                                         | ( TITLE-ABS-KEY ( neoplasia* ) OR TITLE-ABS-KEY ( neoplasm* ) OR TITLE-ABS-KEY ( tumor* ) OR TITLE-ABS-KEY ( cancer* ) OR TITLE-ABS-KEY ( malignanc* ) ) AND TITLE-ABS-KEY ( risk* ) AND TITLE-ABS-KEY ( acrylamide* )                                                                                            |

Appendix 2

**Figure S1.** Forest plot of dietary acrylamide exposure and risk of oral cavity cancer. CI: confidence interval; RR: relative risk.

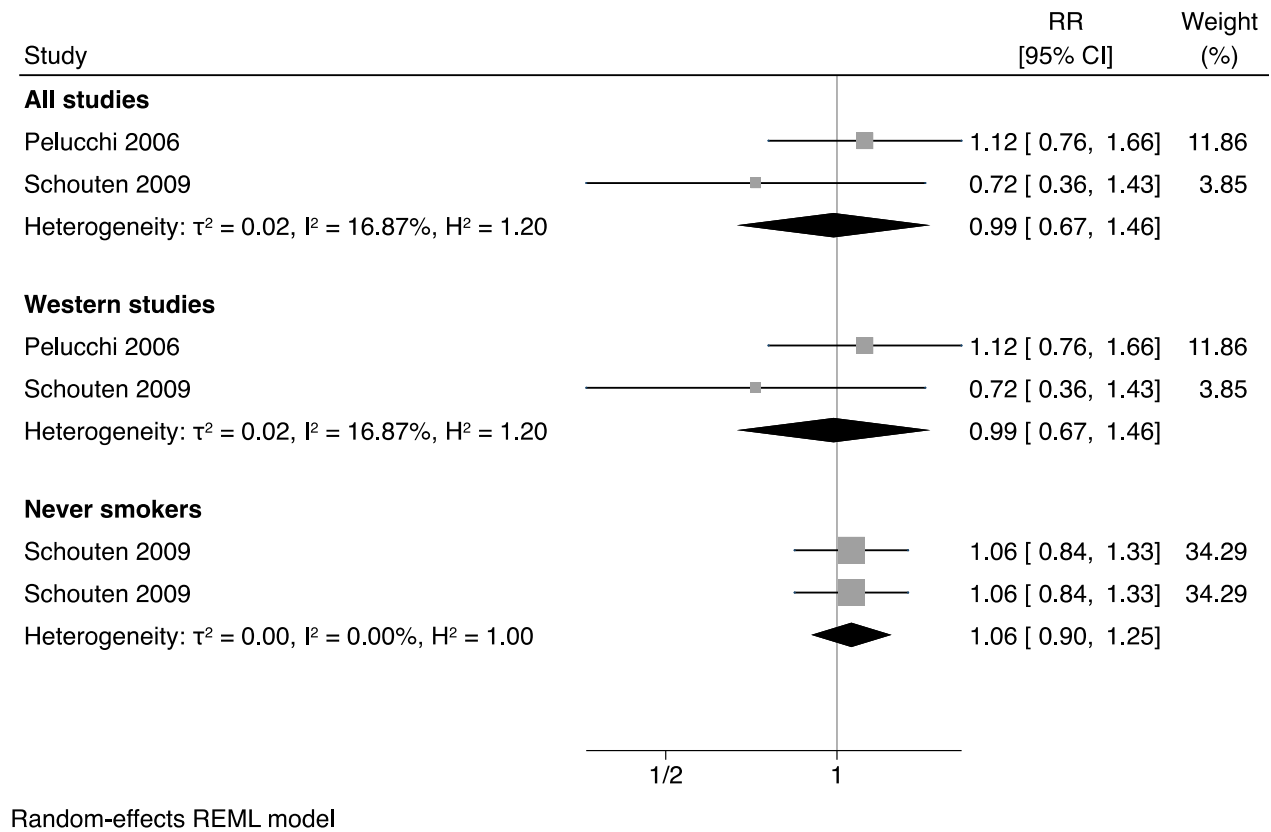

**Figure S2.** Forest plot and funnel plot of dietary acrylamide exposure and risk of esophageal cancer. CI: confidence interval; RR: relative risk; SE: standard error.

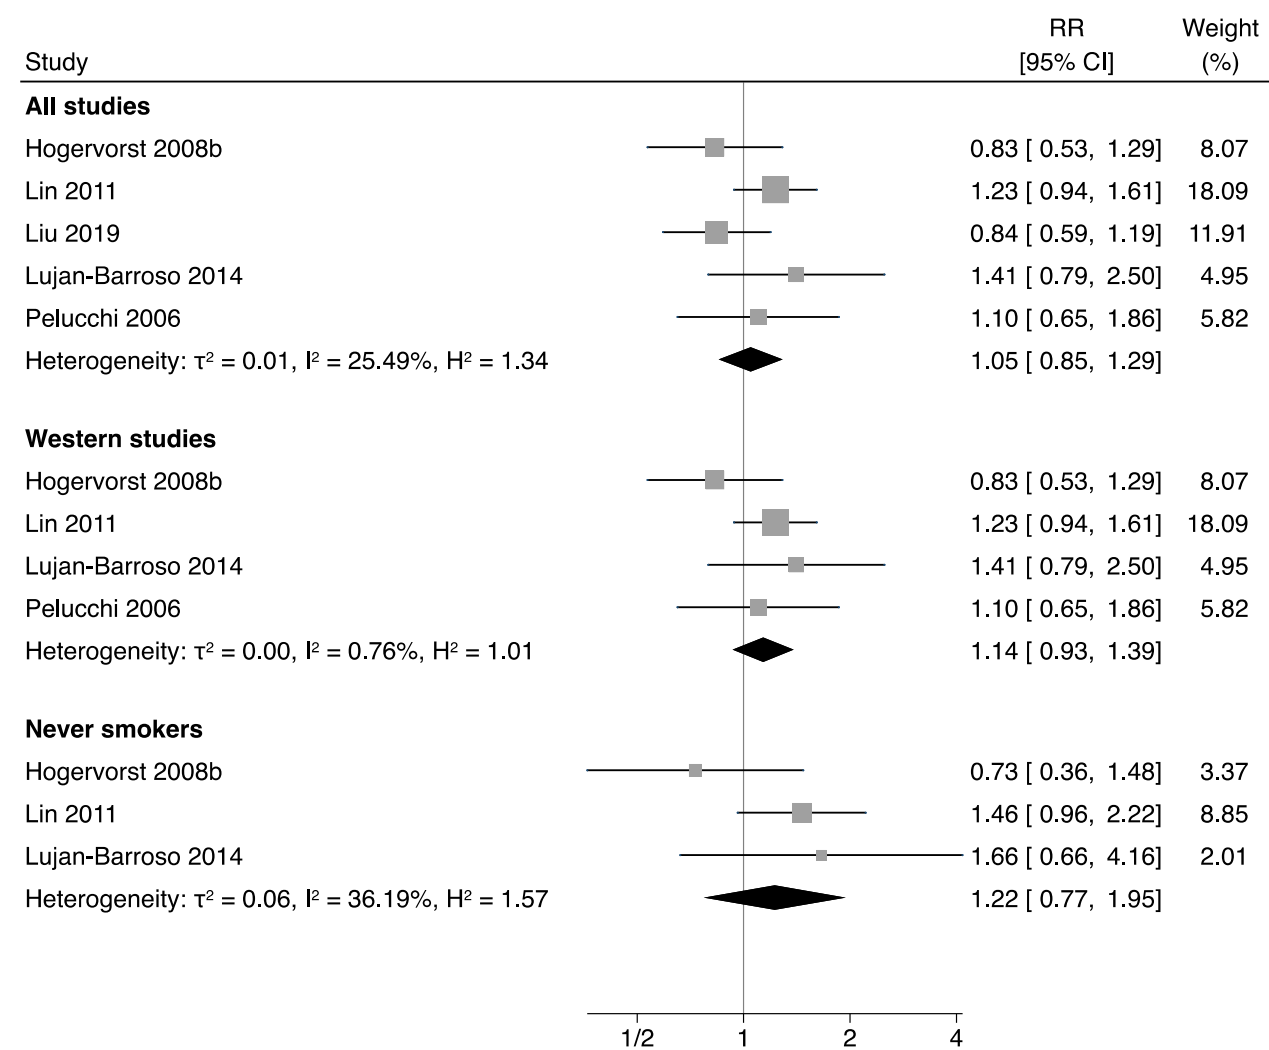

Random-effects REML model

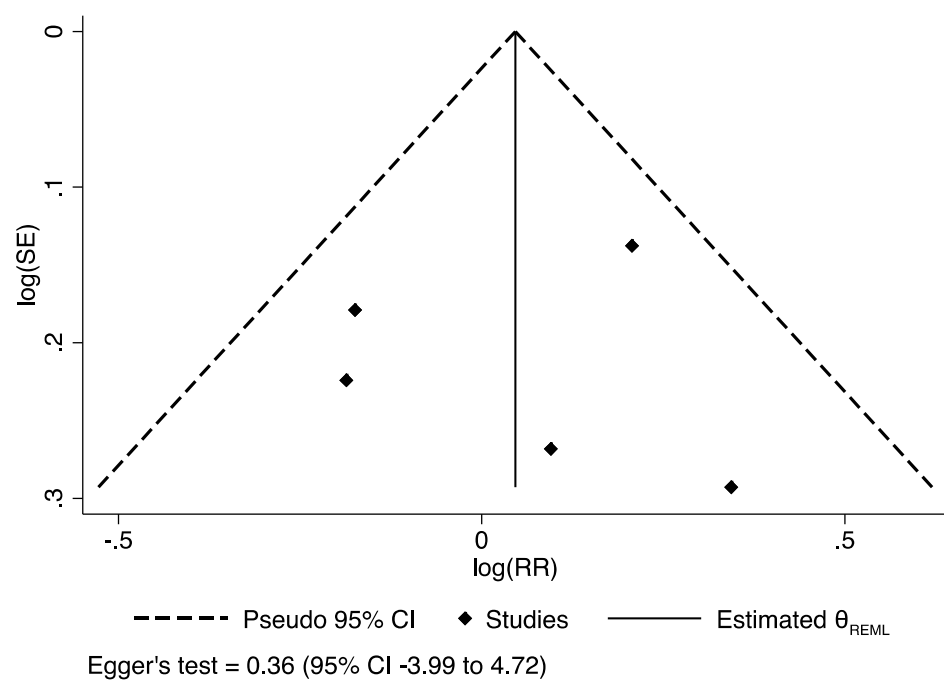

**Figure S3.** Forest plot of dietary acrylamide exposure and risk of stomach cancer. CI: confidence interval; RR: relative risk.

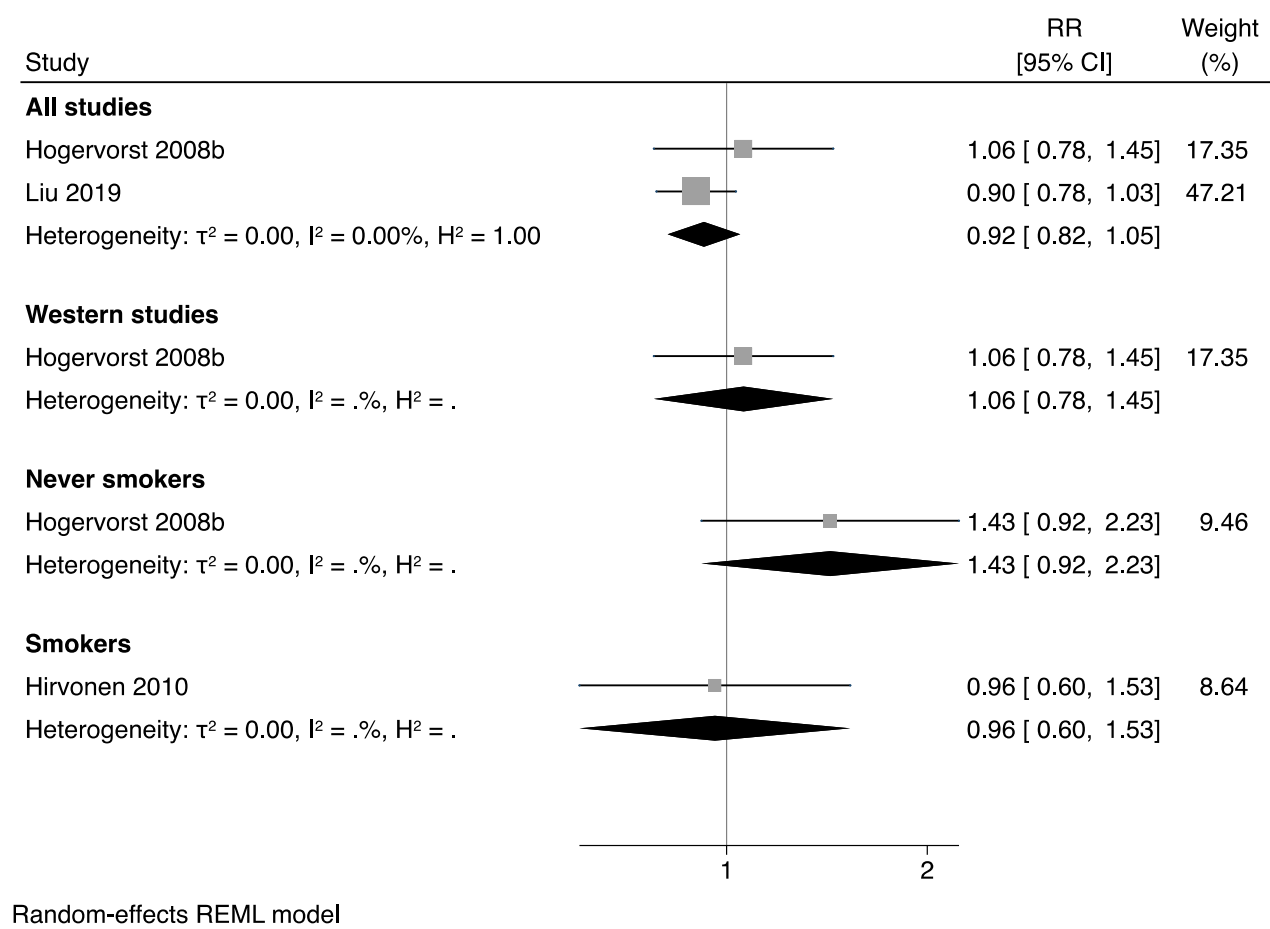

**Figure S4.** Forest plot and funnel plot of dietary acrylamide exposure and risk of colorectal cancer. CI: confidence interval; RR: relative risk; SE: standard error.

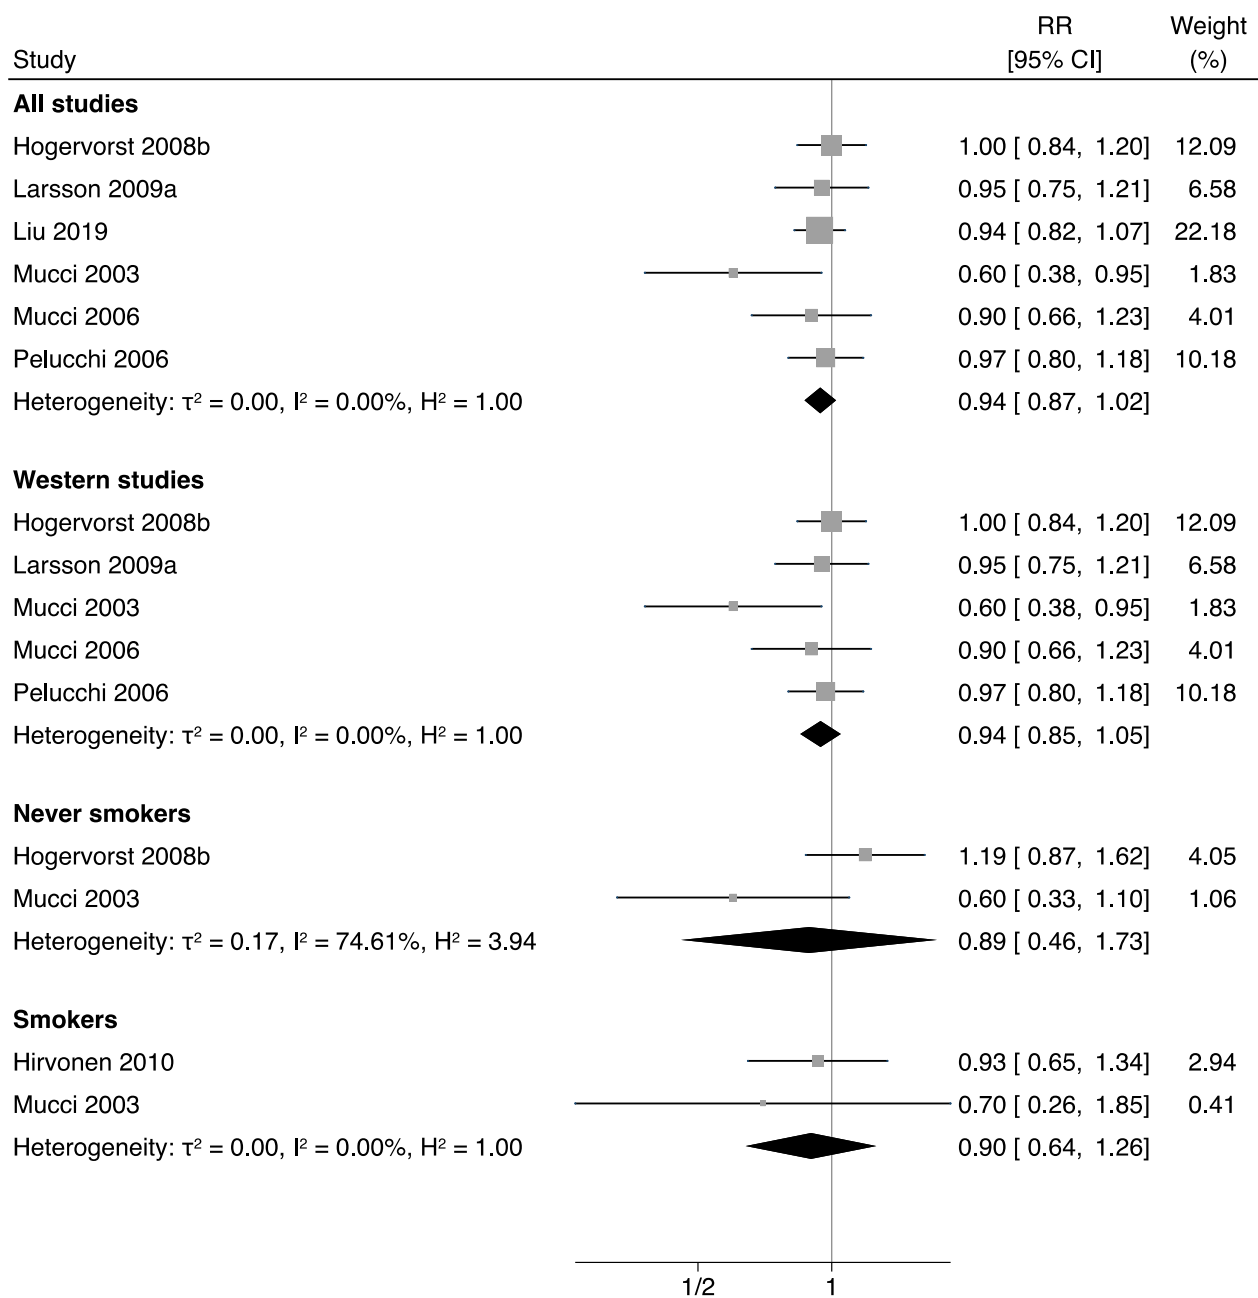

Random-effects REML model

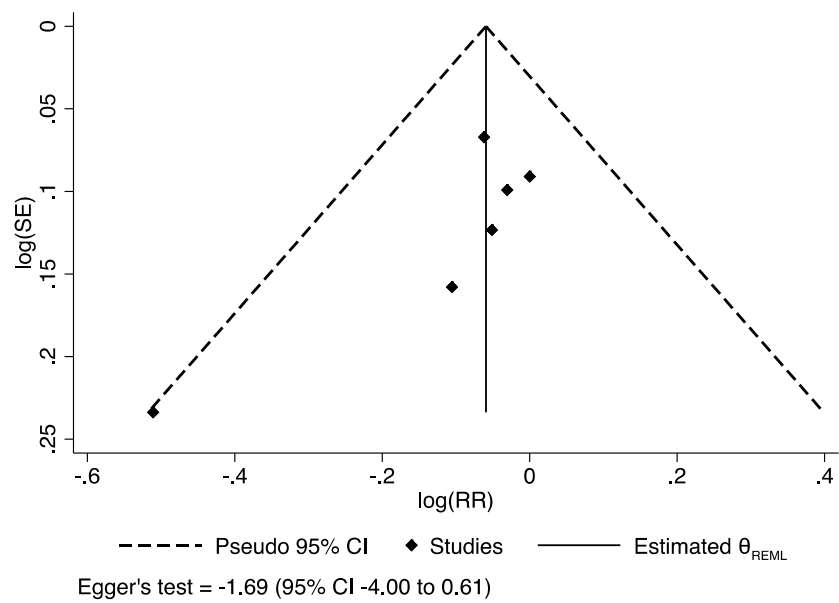

**Figure S5.** Forest plot of dietary acrylamide exposure and risk of colon cancer. CI: confidence interval; RR: relative risk.

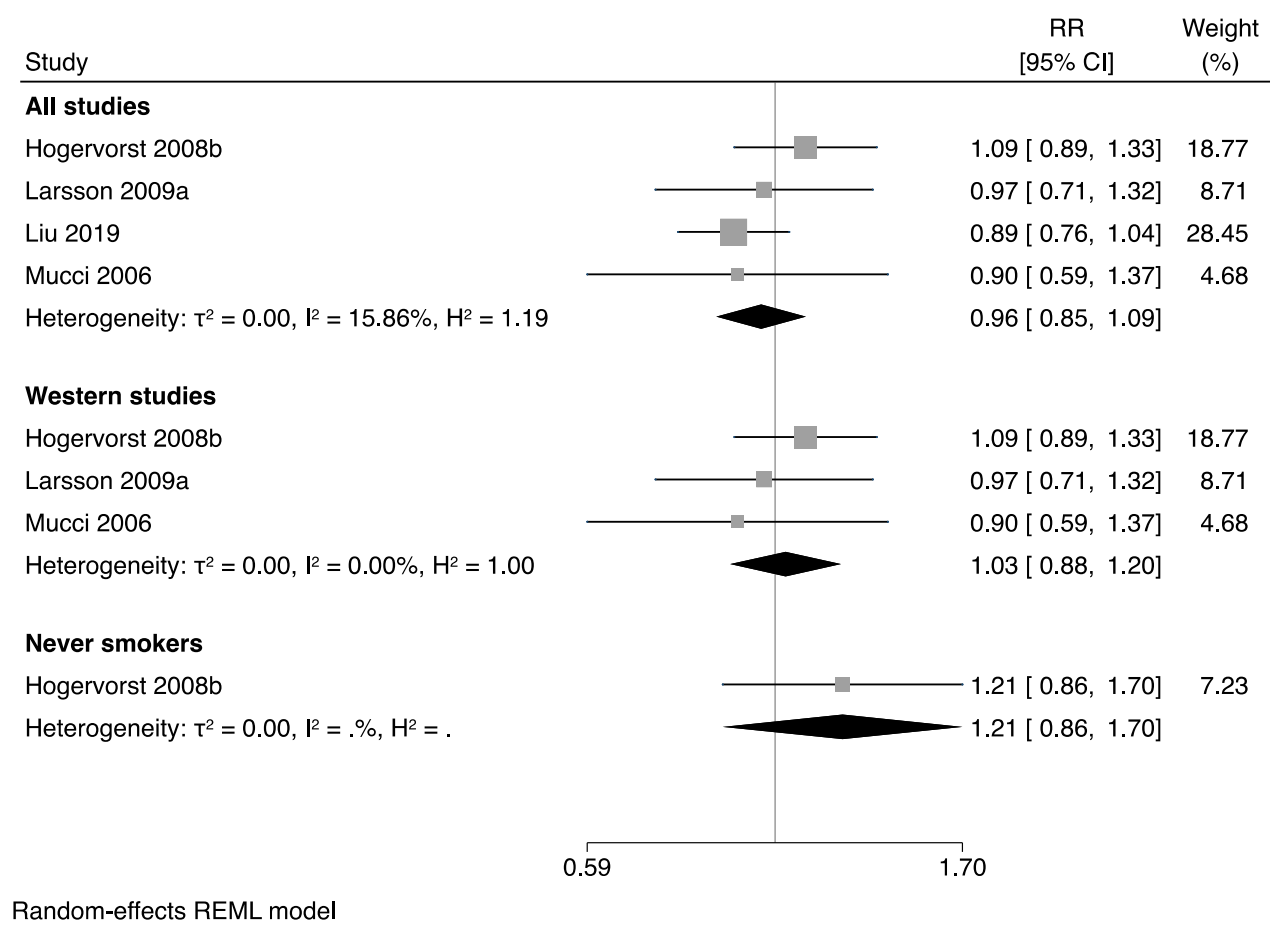

**Figure S6.** Forest plot of dietary acrylamide exposure and risk of rectal cancer. CI: confidence interval; RR: relative risk.

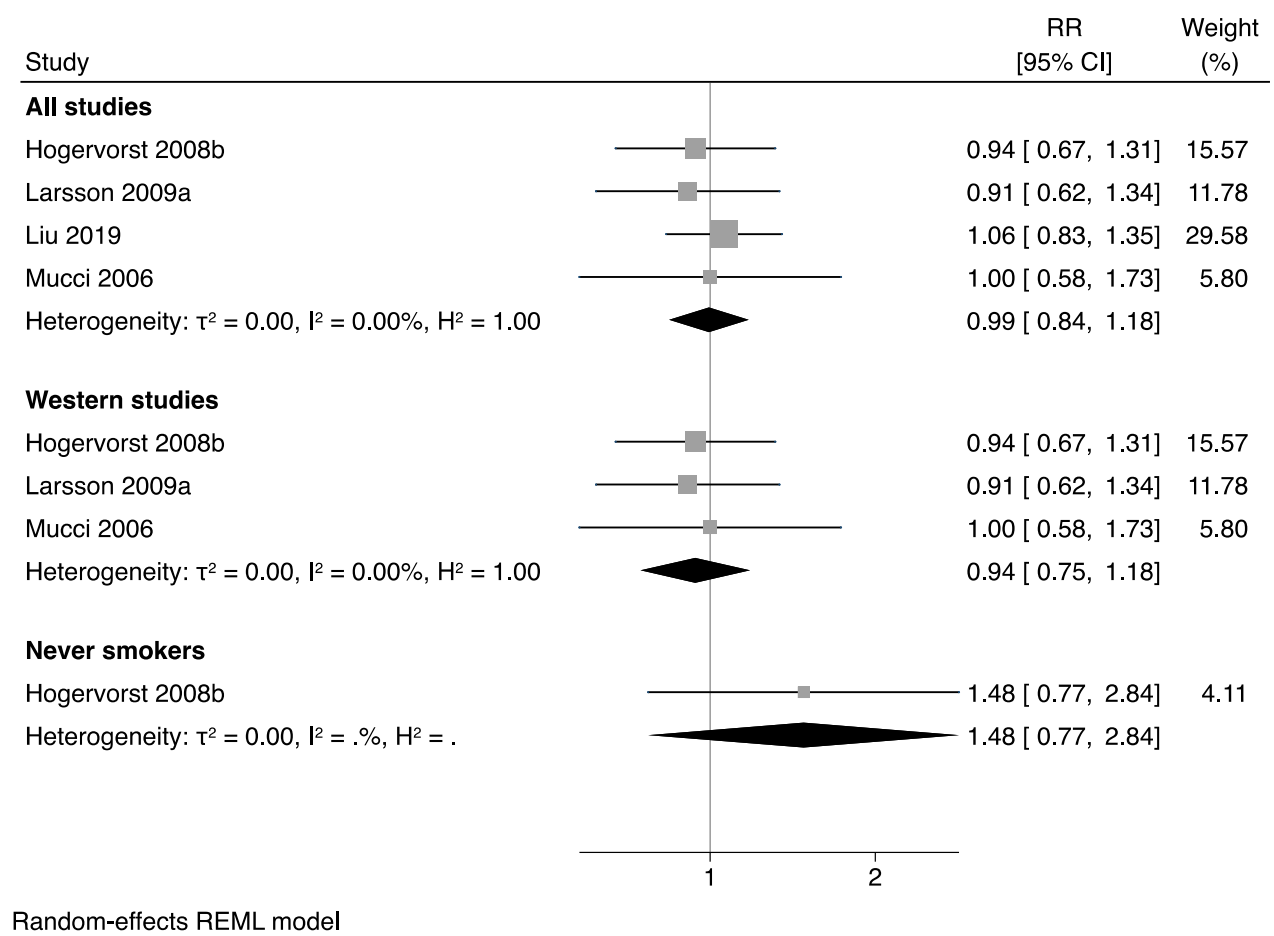

**Figure S7.** Forest plot and funnel plot of dietary acrylamide exposure and risk of pancreatic cancer. CI: confidence interval; RR: relative risk; SE: standard error.

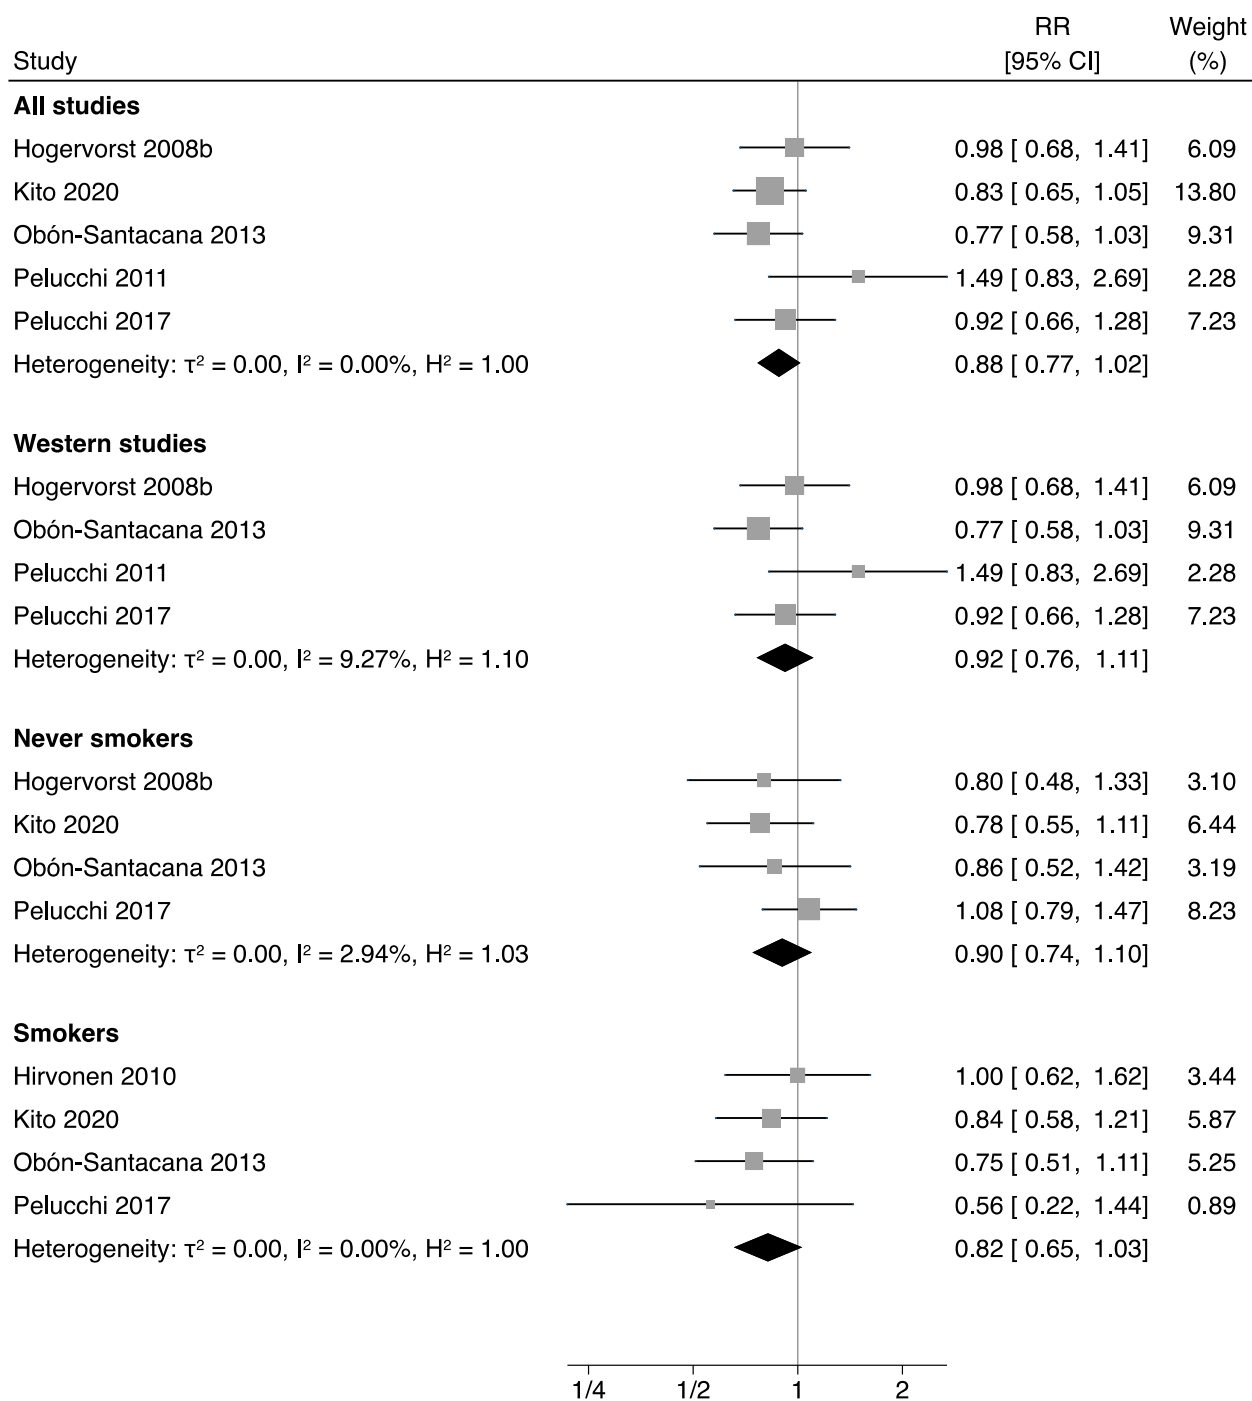

Random-effects REML model

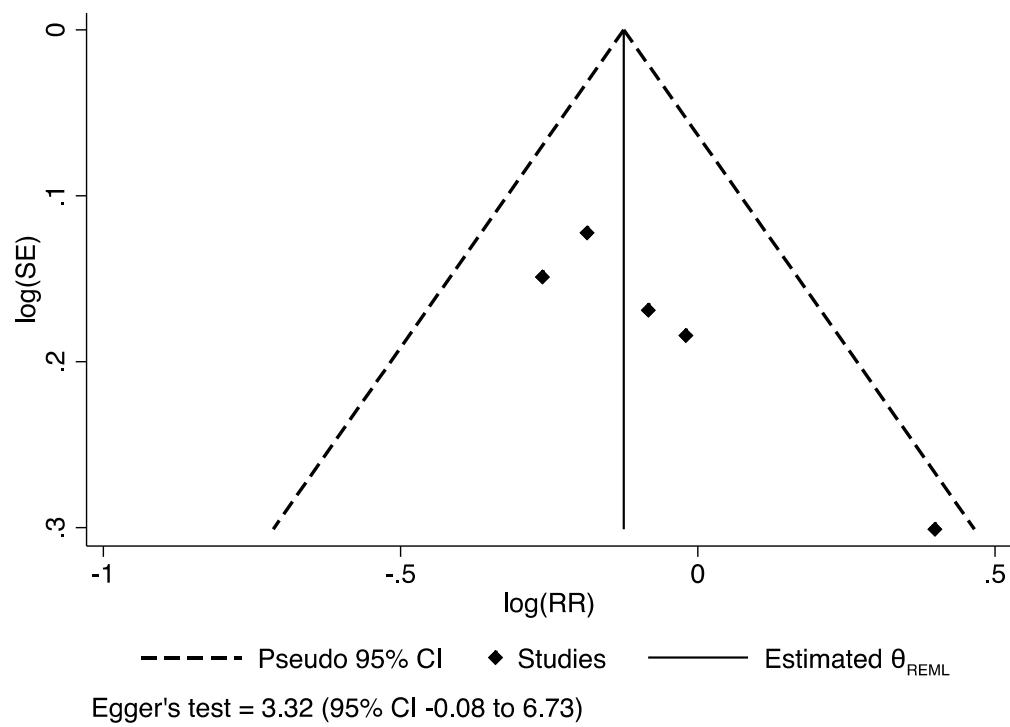

**Figure S8.** Forest plot of dietary acrylamide exposure and risk of laryngeal cancer. CI: confidence interval; RR: relative risk.

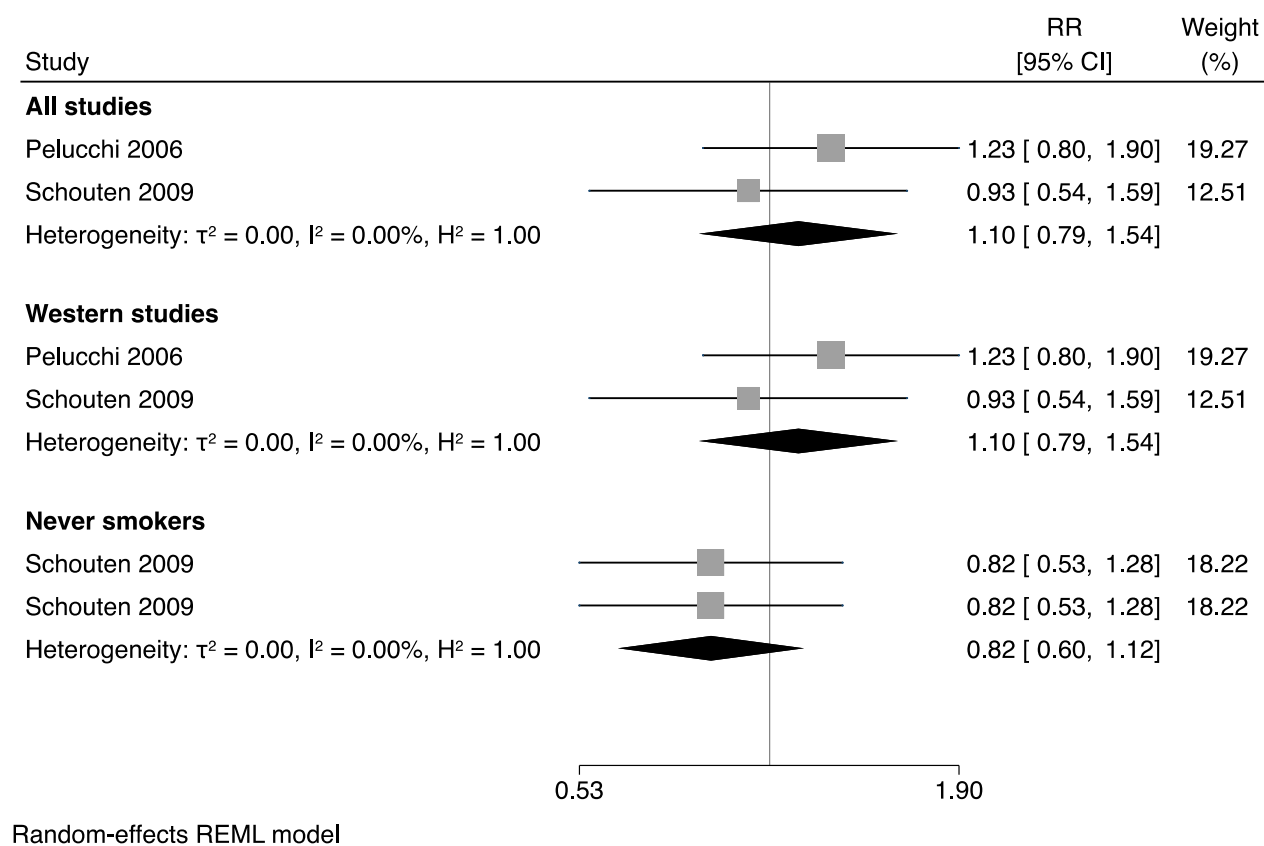

**Figure S9.** Forest plot of dietary acrylamide exposure and risk of lung cancer. CI: confidence interval; RR: relative risk.

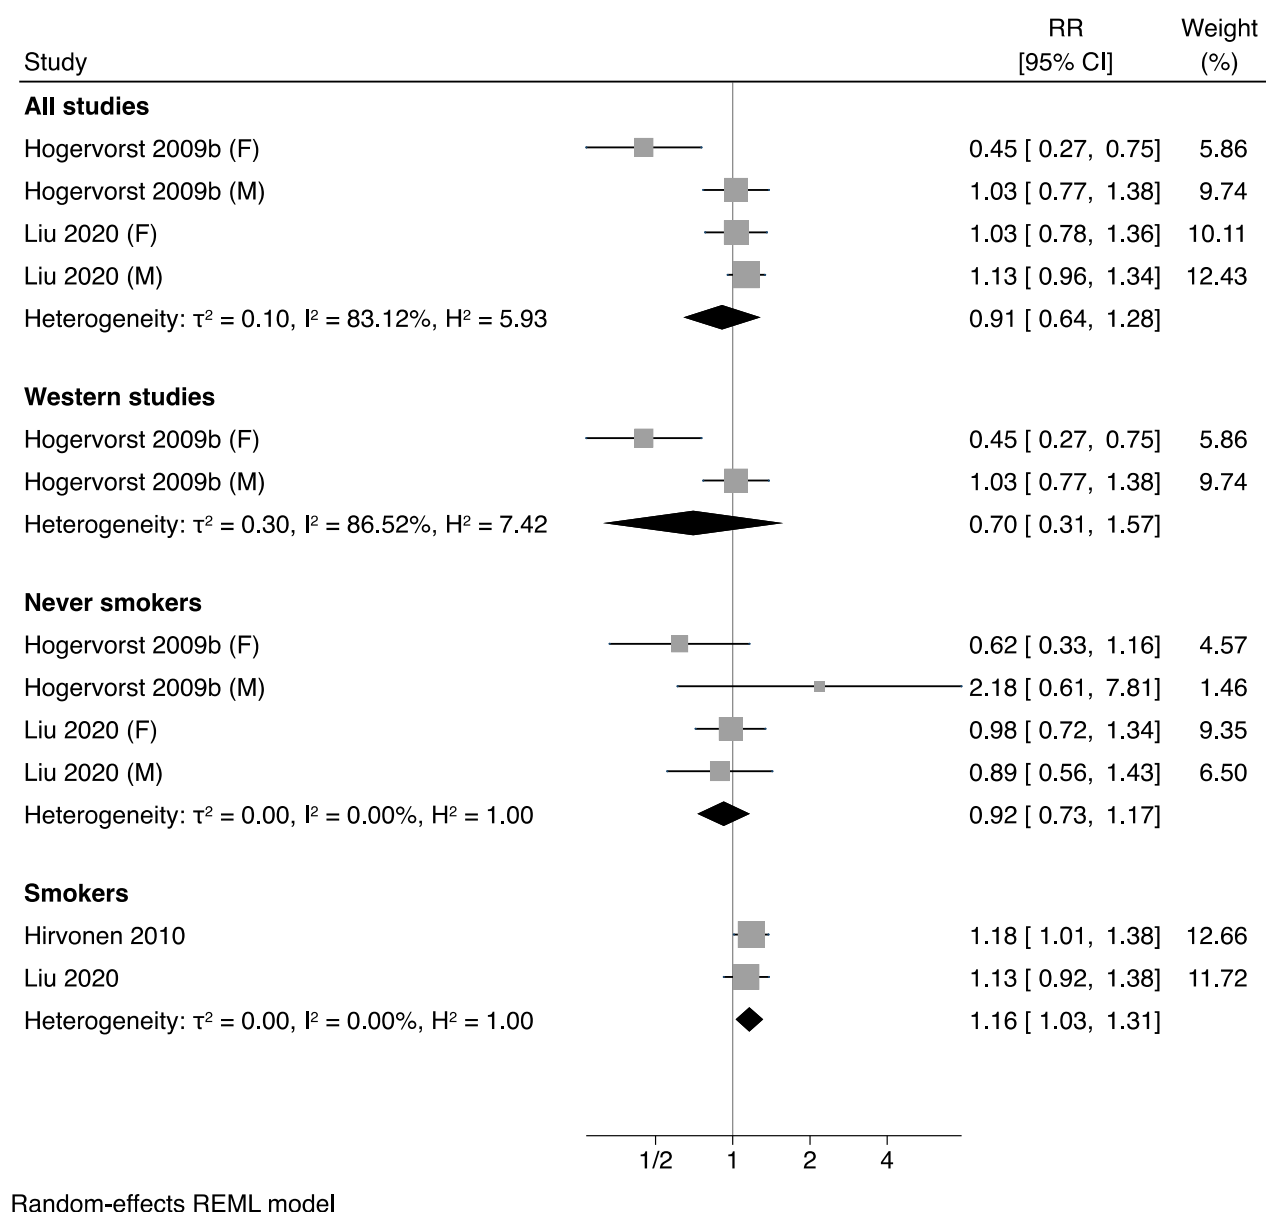

**Figure S10.** Forest plot of dietary acrylamide exposure and risk of bladder cancer. CI: confidence interval; RR: relative risk.

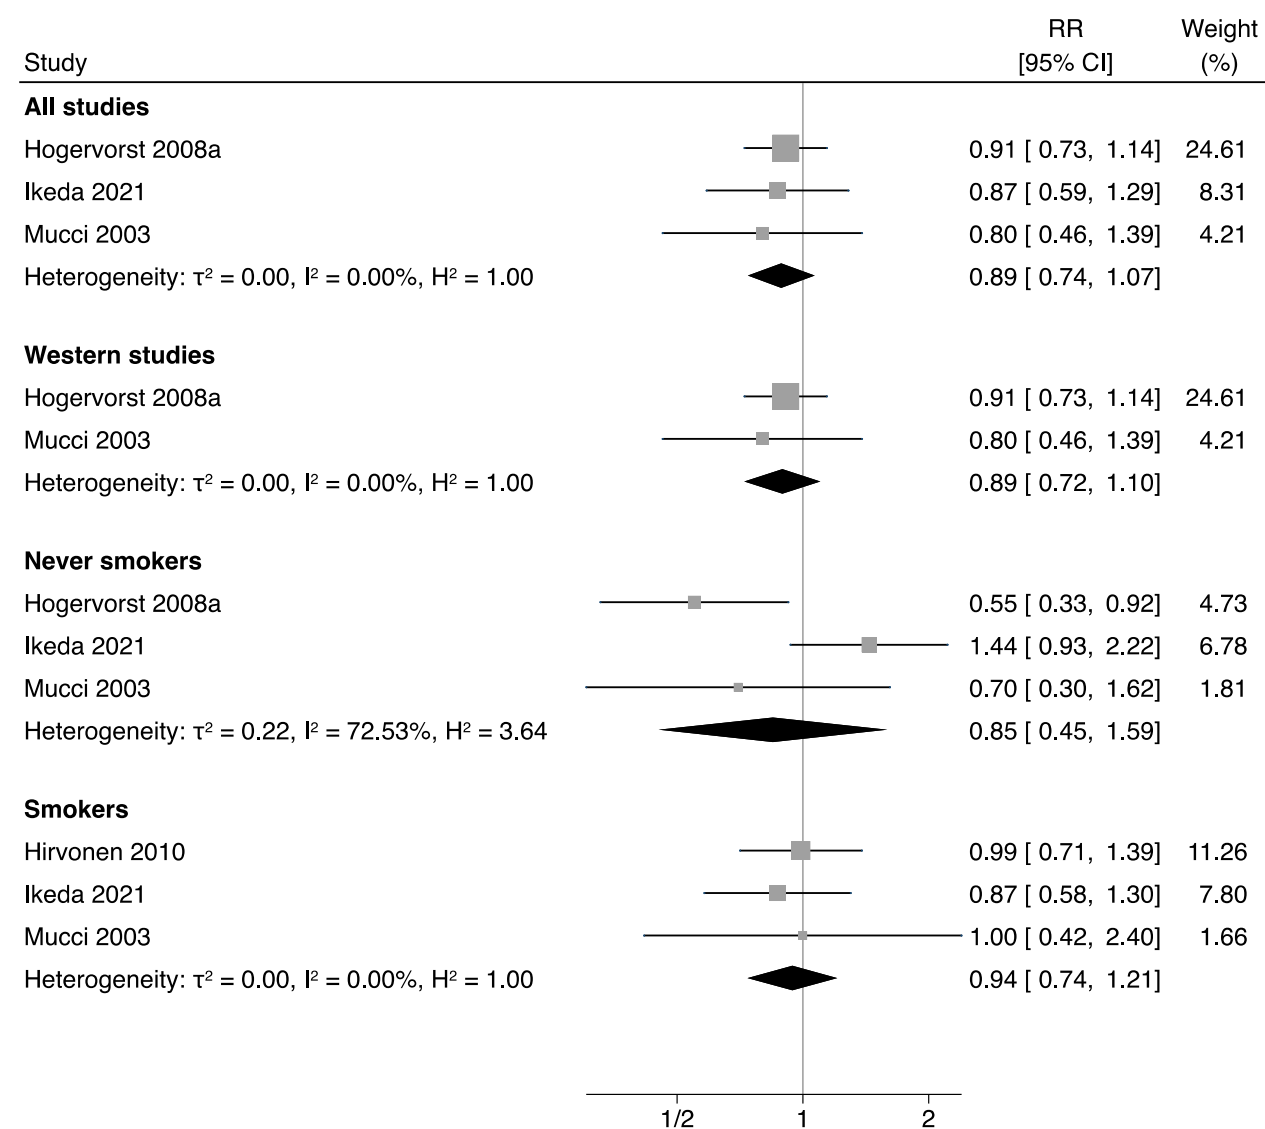

Random-effects REML model

**Figure S11.** Forest plot and funnel plot of dietary acrylamide exposure and risk of renal cancer. CI: confidence interval; RR: relative risk; SE: standard error.

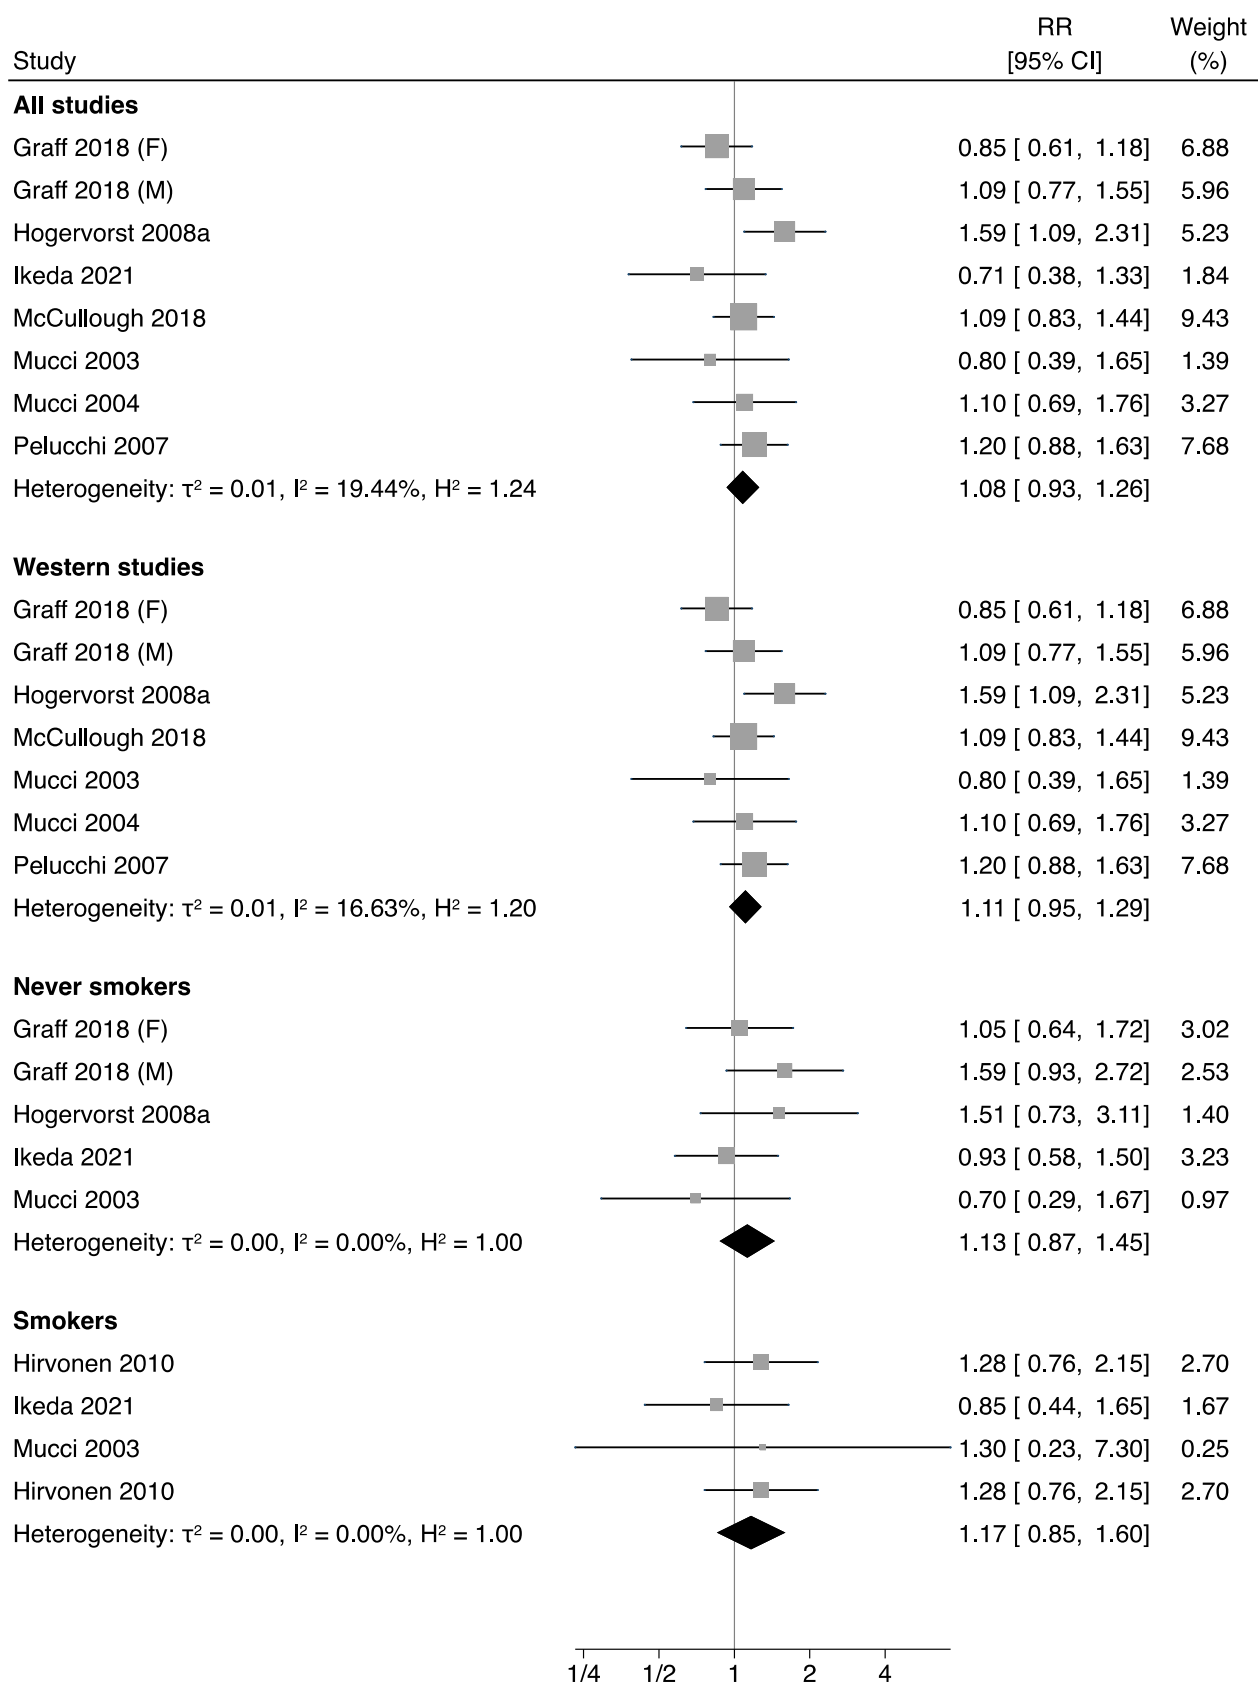

Random-effects REML model

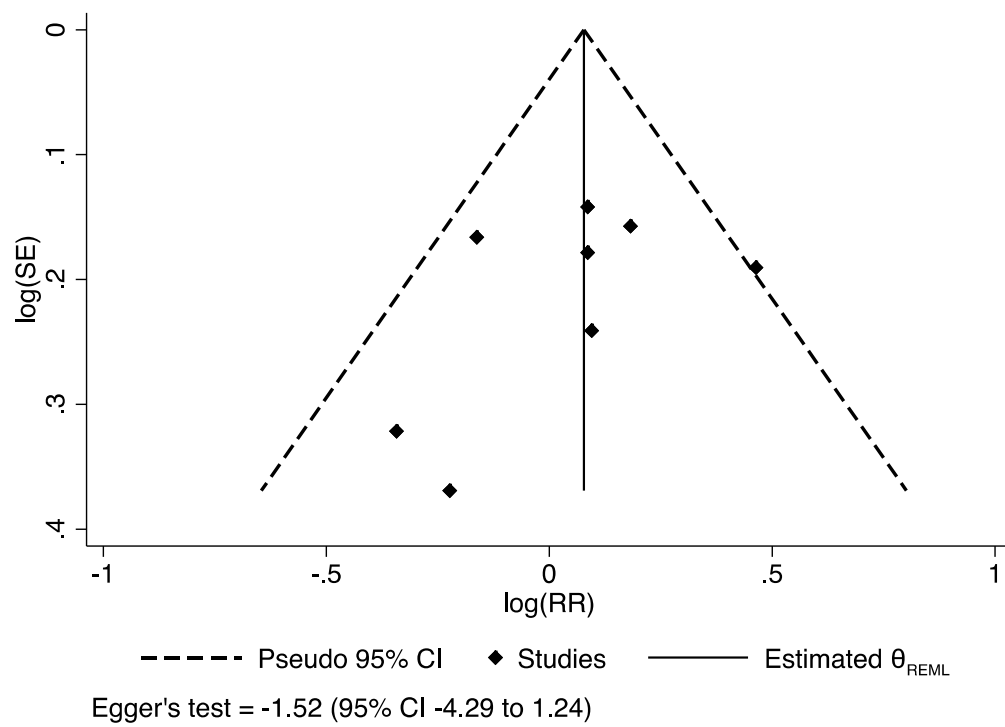

**Figure S12.** Forest plot and funnel plot of dietary acrylamide exposure and risk of prostatic cancer.  
CI: confidence interval; RR: relative risk; SE: standard error.

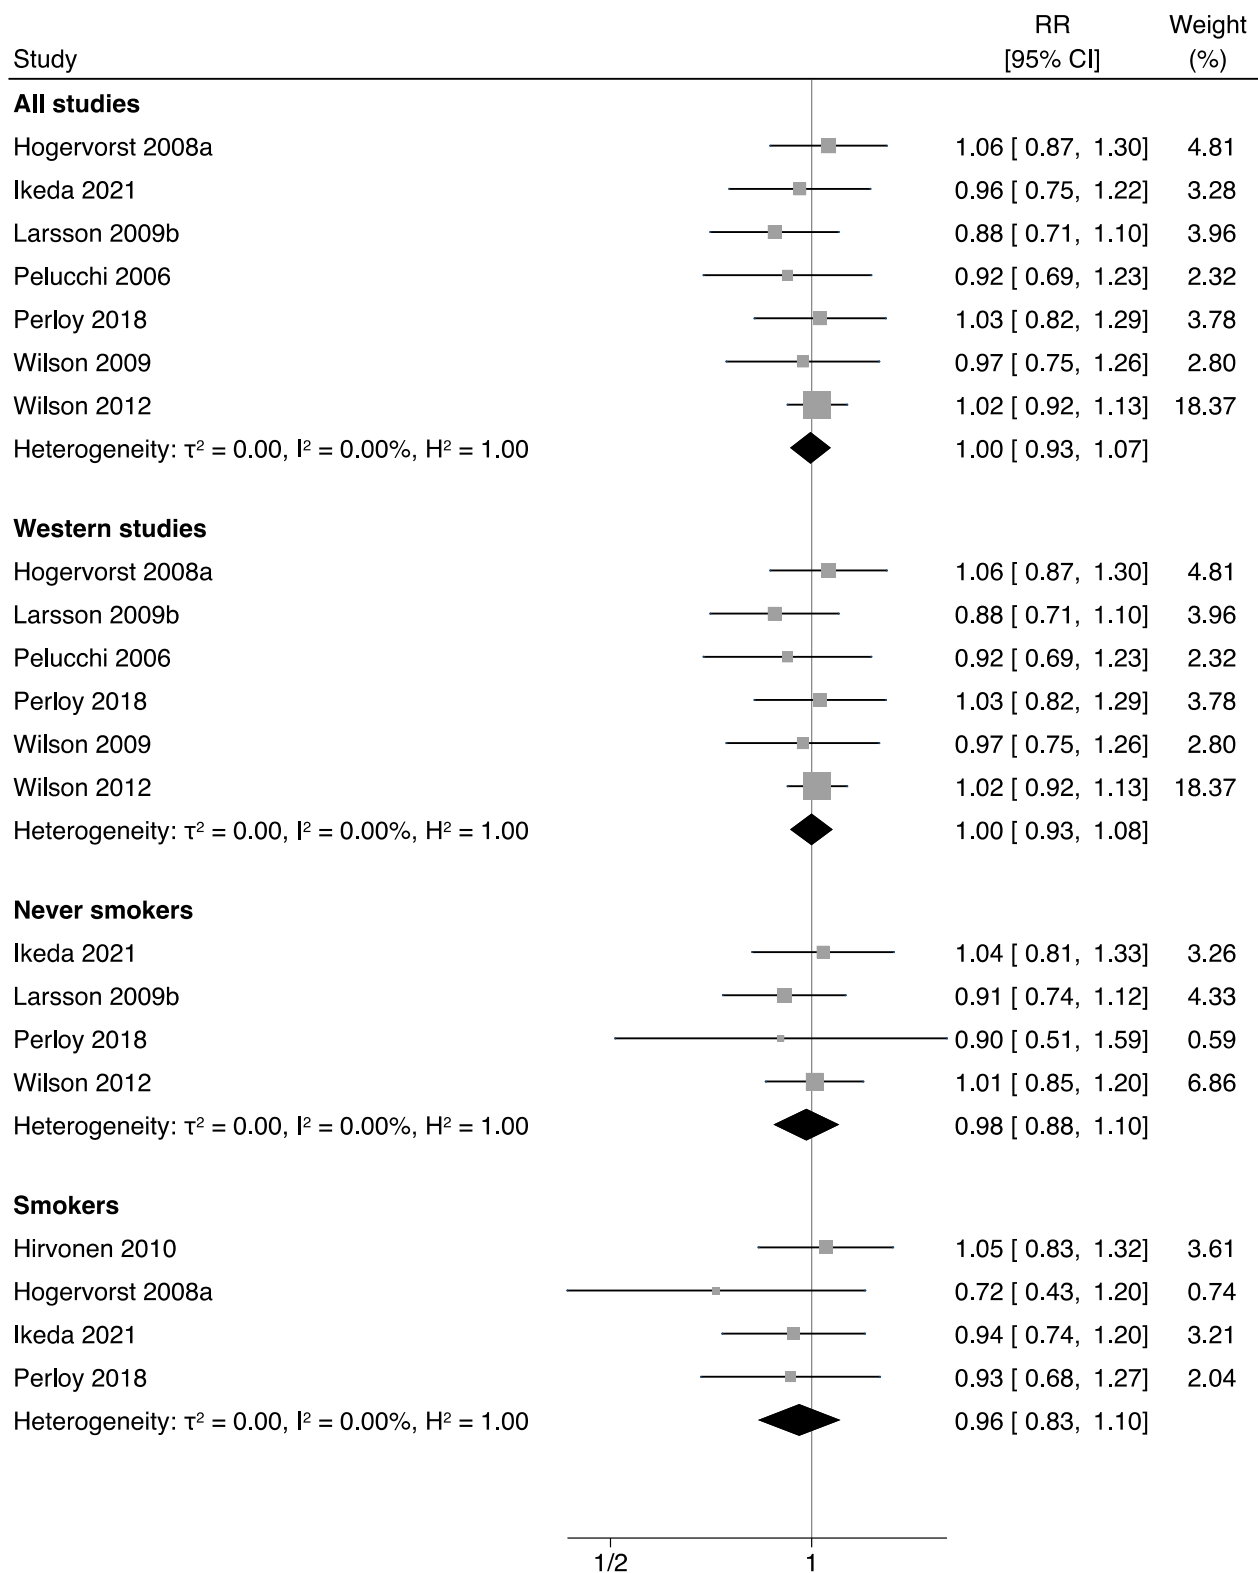

Random-effects REML model

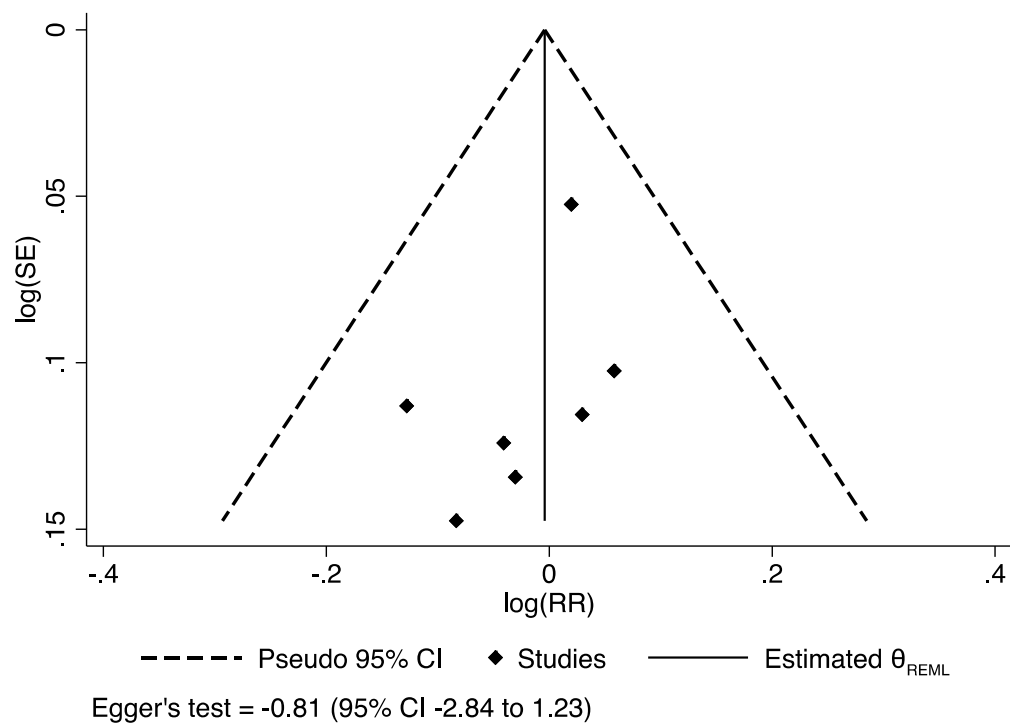

**Figure S13.** Forest plot of dietary acrylamide exposure and risk of lymphoma. CI: confidence interval; RR: relative risk.

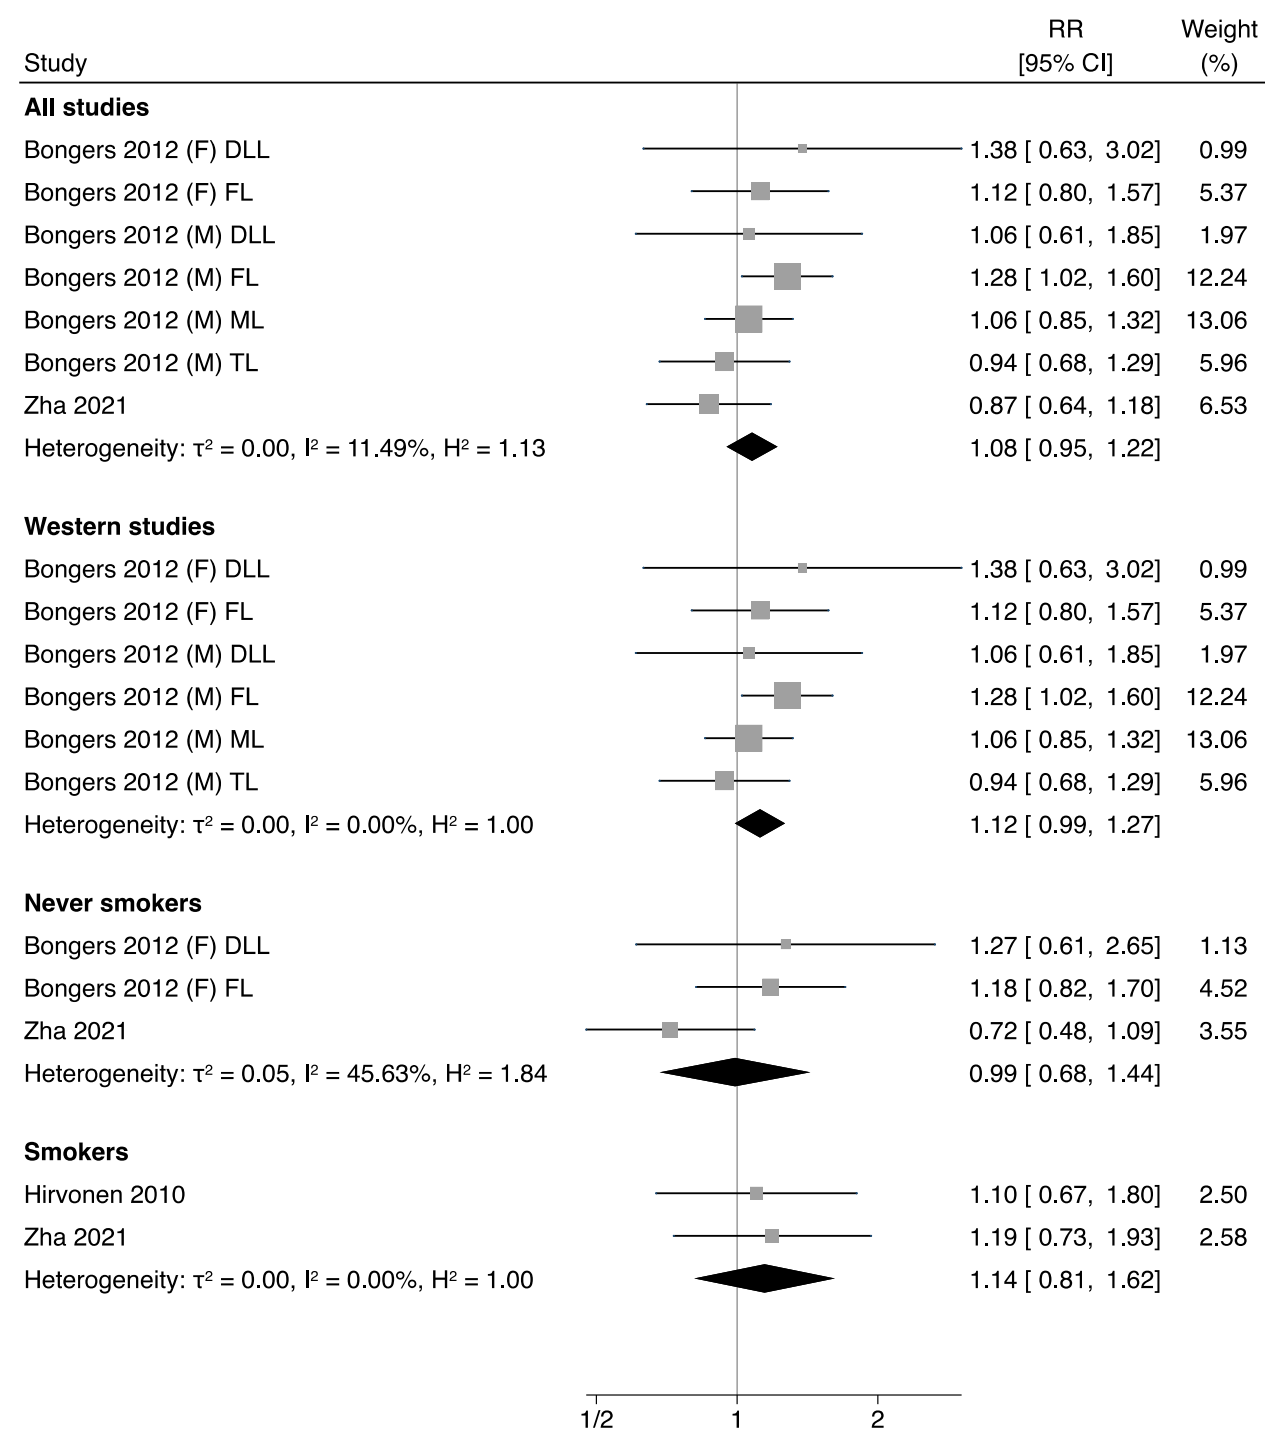

Random-effects REML model

**Figure S14.** Forest plot of dietary acrylamide exposure and risk of multiple myeloma. CI: confidence interval; RR: relative risk.

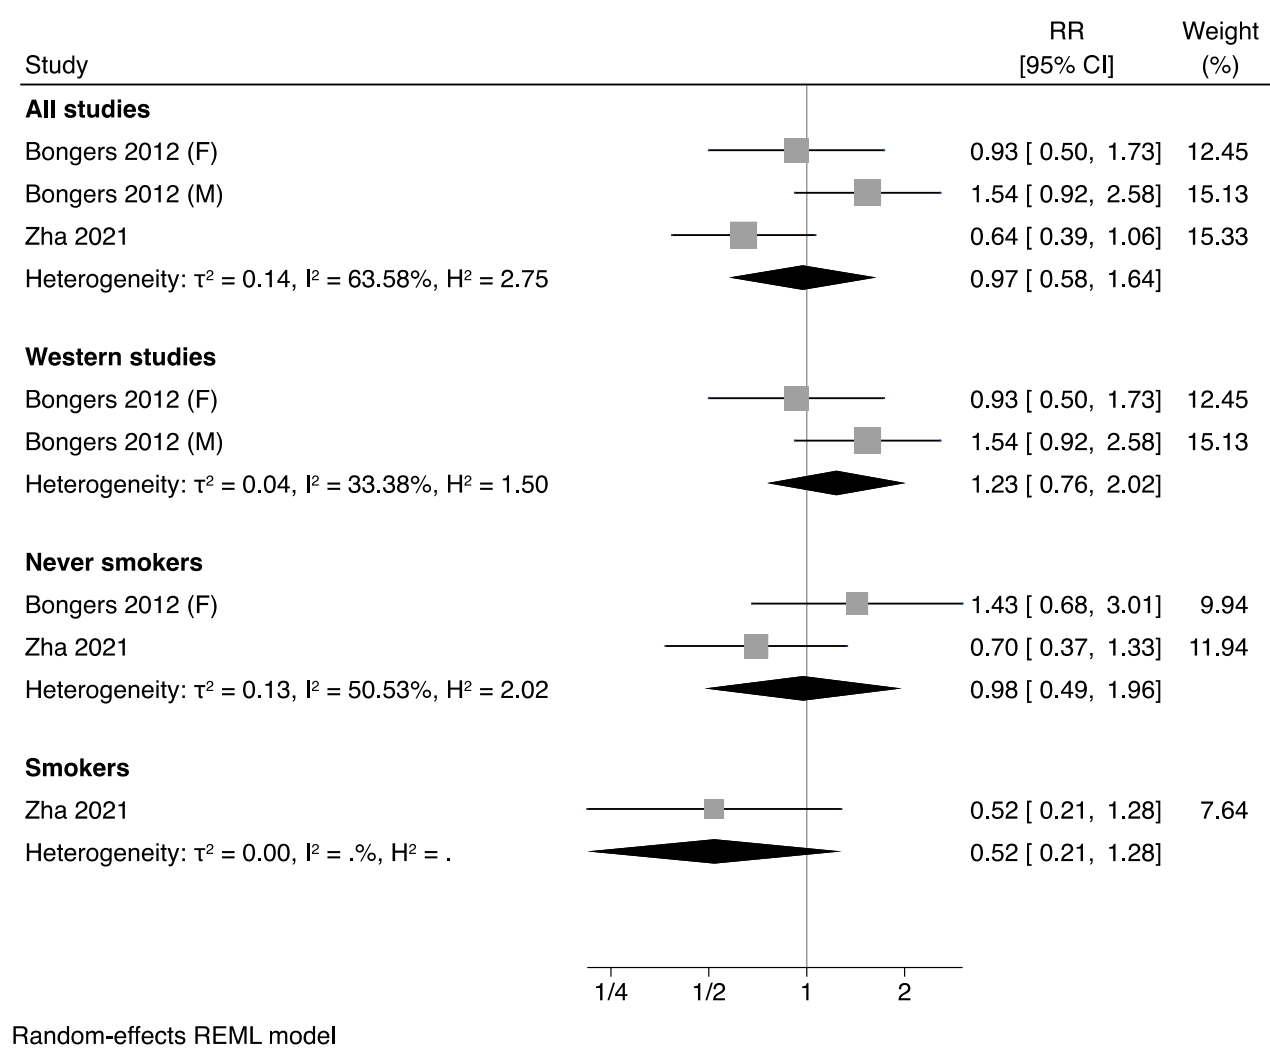

**Figure S15.** Forest plot of dietary acrylamide exposure and risk of melanoma. CI: confidence interval; RR: relative risk.

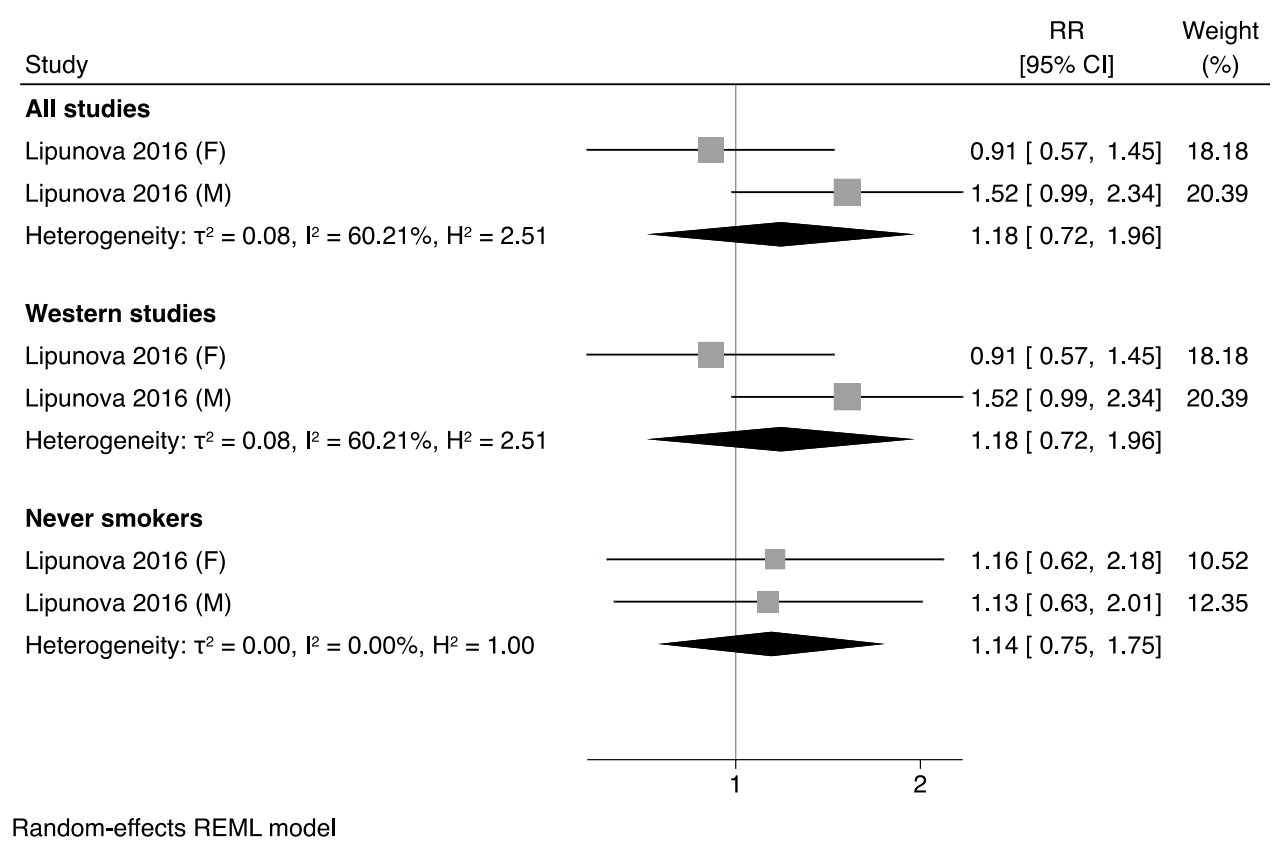

**Figure S16.** Results of the risk of bias assessment, using the ROBINS-I. Risk of bias domains by studies included.

|                     | Risk of bias domains |    |    |    |    |    |    | Overall |
|---------------------|----------------------|----|----|----|----|----|----|---------|
|                     | D1                   | D2 | D3 | D4 | D5 | D6 | D7 |         |
| Bongers 2012        | -                    | +  | +  | ?  | ?  | +  | +  | ?       |
| Graff 2018          | -                    | +  | +  | ?  | ?  | +  | +  | ?       |
| Hirvonen 2010       | -                    | +  | +  | ?  | ?  | +  | +  | ?       |
| Hogervorst 2008a    | -                    | +  | +  | ?  | ?  | +  | +  | ?       |
| Hogervorst 2008b    | -                    | +  | +  | ?  | ?  | +  | +  | ?       |
| Hogervorst 2009a    | -                    | +  | +  | ?  | ?  | +  | +  | ?       |
| Hogervorst 2009b    | -                    | +  | +  | ?  | ?  | +  | +  | ?       |
| Ikeda 2021          | -                    | +  | +  | ?  | ?  | +  | +  | ?       |
| Kito 2020           | -                    | +  | +  | ?  | ?  | +  | +  | ?       |
| Larsson 2009a       | -                    | +  | +  | ?  | ?  | +  | +  | ?       |
| Larsson 2009b       | -                    | +  | +  | ?  | ?  | +  | +  | ?       |
| Lin 2011            | -                    | -  | -  | ?  | +  | +  | +  | ?       |
| Lipunova 2016       | -                    | +  | +  | ?  | ?  | +  | +  | ?       |
| Liu 2019            | -                    | +  | +  | ?  | ?  | +  | +  | ?       |
| Liu 2020            | -                    | +  | +  | ?  | ?  | +  | +  | ?       |
| Lujan-Barroso 2014  | -                    | +  | +  | ?  | ?  | +  | +  | ?       |
| McCullough 2019     | -                    | +  | +  | ?  | ?  | +  | +  | ?       |
| Mucci 2003          | -                    | -  | -  | +  | ?  | +  | +  | ?       |
| Mucci 2004          | -                    | -  | -  | +  | +  | +  | +  | -       |
| Mucci 2006          | -                    | +  | +  | ?  | ?  | +  | +  | ?       |
| Obón-Santacana 2013 | -                    | +  | +  | ?  | ?  | +  | +  | ?       |
| Pelluchi 2006       | -                    | -  | -  | +  | +  | +  | +  | -       |
| Pelluchi 2011       | -                    | -  | -  | +  | +  | +  | +  | -       |
| Pelluchi 2016       | -                    | -  | -  | +  | ?  | +  | +  | ?       |
| Pelucchi 2007       | -                    | -  | -  | +  | +  | +  | +  | -       |
| Perloy 2018         | -                    | +  | +  | ?  | ?  | +  | +  | ?       |
| Schouten 2009       | -                    | +  | +  | ?  | ?  | +  | +  | ?       |
| Wilson 2009         | -                    | -  | -  | +  | ?  | +  | +  | ?       |
| Wilson 2011         | -                    | +  | +  | ?  | ?  | +  | +  | ?       |
| Zha 2020            | -                    | +  | +  | ?  | ?  | +  | +  | ?       |
| Zha 2021            | -                    | +  | +  | ?  | ?  | +  | +  | ?       |

Study

Domains:  
D1: Bias due to confounding.  
D2: Bias due to selection of participants.  
D3: Bias in classification of interventions.  
D4: Bias due to deviations from intended interventions.  
D5: Bias due to missing data.  
D6: Bias in measurement of outcomes.  
D7: Bias in selection of the reported result.

Judgement  
- Moderate  
+ Low  
? No information

**Figure S17.** Results of the risk of bias assessment, using the ROBINS-I. Overall graphical representation of risk of bias by domains

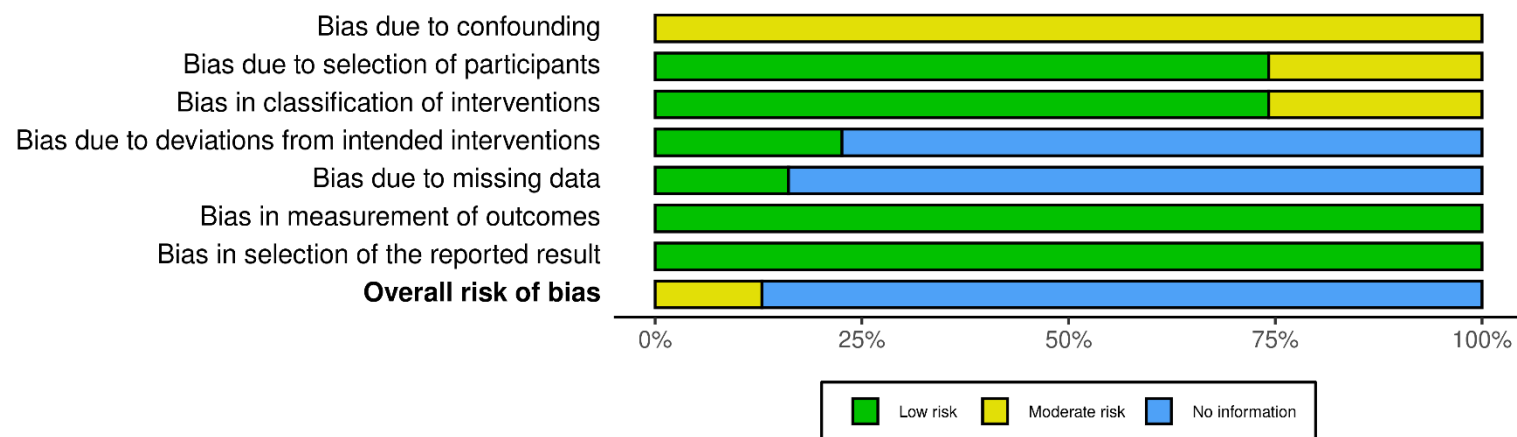

Supplement: Supplementary file [file 34890840]
